# Supplementary material
Source: MDPI journal article supplement (https://www.mdpi.com/2073-4395/13/6/1520)
Supplement: s1 [file s1]

**Table S1** The primers used in this study

| Primer name | Primer sequence (5' to 3')           | Purpose                                                |
|-------------|--------------------------------------|--------------------------------------------------------|
| Target1g++  | ggcaTGACGTTGCTGGCGATCGA              | Primers for CRISPR/Cas9 vector construction            |
| Target1g--  | aaacTCGATCGCCAGCAACGTCA              |                                                        |
| Target2g++  | ggcaGGTCAACGTCGAGACCGGC              |                                                        |
| Target2g--  | aaacGCCGGTCTCGACGTTGACC              |                                                        |
| InDel1 F    | TGCAGCACGAGGGCGATG                   | Primers of fragment amplification surrounding Target 1 |
| InDel1 R    | GAGGAAGGCGAGGATGGTG                  |                                                        |
| InDel2 F    | CAGGGACAACATGCGGGC                   | Primers of fragment amplification surrounding Target 2 |
| InDel2 R    | GGGCACCTCGACGTACCT                   |                                                        |
| Hi-Target1F | ggagtgagtacggtgtgcTGCAGCACGAGGGCGATG | Primers for detection of Target 1 in YY1540            |
| Hi-Target1R | gagttggatgctggatggGGGATGAGGCCCCTGATG |                                                        |
| Hi-Target2F | ggagtgagtacggtgtgcCAGGGACAACATGCGGGC | Primers for detection of Target 2 in YY1540            |
| Hi-Target2R | gagttggatgctggatggGGGCACCTCGACGTACCT |                                                        |
